# Supplementary material for: Adenosine-5′-Phosphosulfate- and Sulfite Reductases Activities of Sulfate-Reducing Bacteria from Various Environments
Source: PubMed Central journal article supplement (PMC7357011; doi:10.3390/biom10060921), 2020-06-17
Supplement: biomolecules-10-00921-s001.pdf [file biomolecules-10-00921-s001.pdf]

**SUPPLEMENTARY MATERIALS**

**Table 1S. Oxidation of photochemically reduced methyl viologen**

| Time (min) | Ferricyanide reduction ( $\mu\text{mol}/\text{mg}$ protein) |       |
|------------|-------------------------------------------------------------|-------|
|            | VIB-7                                                       | ROD-9 |
| 5          | 2.9                                                         | 1     |
| 10         | 5.3                                                         | 1.7   |
| 15         | 7.149                                                       | 2.3   |
| 20         | 8.8                                                         | 2.970 |
| 25         | 10.1                                                        | 3.207 |
| 30         | 10.2                                                        | 3.3   |

**Table 2S. Hydrogen uptake ( $\mu\text{moles}$ )**

| Time (min) | VIB-7 | ROD-9 |
|------------|-------|-------|
| 5          | 0.9   | 0.49  |
| 10         | 1.37  | 0.678 |
| 15         | 1.51  | 0.939 |
| 20         | 1.59  | 1.04  |
| 25         | 1.69  | 1.165 |
| 40         | 1.77  | 1.24  |
| 60         | 1.84  | 1.34  |
| 80         | 1.86  | 1.36  |
| 100        | 1.88  | 1.36  |

**Table 3S. Oxidation of NADH ( $\text{mM}/\text{mg}$  of protein) in time (min) via sulfite reductase**

| Time (min) | DVI-10 | TC2   | TC4   | DVI-642 | DVI-644 |
|------------|--------|-------|-------|---------|---------|
| 1          | 0.930  | 0.763 | 1.178 | 1.102   | 1.044   |
| 2          | 0.501  | 0.510 | 0.691 | 0.572   | 0.576   |
| 3          | 0.333  | 0.315 | 0.455 | 0.369   | 0.367   |
| 4          | 0.240  | 0.231 | 0.318 | 0.248   | 0.249   |
| 5          | 0.179  | 0.171 | 0.232 | 0.207   | 0.181   |
| 6          | 0.135  | 0.131 | 0.182 | 0.168   | 0.133   |
| 7          | 0.101  | 0.115 | 0.140 | 0.144   | 0.108   |
| 8          | 0.090  | 0.093 | 0.115 | 0.115   | 0.089   |
| 9          | 0.074  | 0.089 | 0.092 | 0.104   | 0.087   |
| 10         | 0.059  | 0.079 | 0.080 | 0.091   | 0.075   |

**Table 4S.** The initial ( $V_0$ ) and maximum (limiting)  $V_{\max}$  rates of enzymatic reactions

| Strains | APS reductase |            | Sulfite reductase |            |
|---------|---------------|------------|-------------------|------------|
|         | $V_0$         | $V_{\max}$ | $V_0$             | $V_{\max}$ |
| DVI-10  | 0.431         | 0.535      | 0.05              | 0.516      |
| TC2     | 0.416         | 0.505      | 0.058             | 0.36       |
| TC3     | 0.548         | 0.629      | 0.049             | 0.503      |
| TC4     | 0.368         | 0.409      | 0.064             | 0.312      |
| DSM642  | 0.335         | 0.389      | 0.077             | 0,23       |
| DSM644  | 0.639         | 0.703      | 0.058             | 0.423      |
| VIB-7   | 0.675         | 0.862      | 0.351             | 0.67       |
| ROD-9   | 0.231         | 0.282      | 0.138             | 0.45       |

**Table 5S.** Affinity rows of APS reductase and sulfite reductase in various strains of sulfate reducing bacteria

| Michaelis constants ( $K_m$ , mM) |               |         |                   |
|-----------------------------------|---------------|---------|-------------------|
| Strains                           | APS reductase | Strains | Sulfite reductase |
| VIB-7                             | 4.33          | DVI-10  | 46.729            |
| ROD-9                             | 3.57          | TC3     | 46.171            |
| DVI-10                            | 2.419         | DSM644  | 31.669            |
| DSM642                            | 2.121         | TC2     | 26.126            |
| TC2                               | 1.594         | TC4     | 19.4              |
| TC3                               | 1.49          | DSM642  | 9.97              |
| TC4                               | 1.103         | ROD-9   | 3.86              |
| DSM644                            | 0.999         | VIB-7   | 3.53              |
